# Supplementary material for: Successful treatment of SARS-CoV-2 in an immunocompromised patient with persistent infection for 245 days: A case report
Source: PubMed Central journal article supplement — Heliyon. 2023 Dec 14;10(1):e23699. doi: 10.1016/j.heliyon.2023.e23699 (PMC10784163; doi:10.1016/j.heliyon.2023.e23699), 2023-12-14
Supplement: mmc2.pdf [file mmc2.pdf]

## SUPPLEMENTAL TABLE

### **Data Availability**

GISAID Identifier: EPI\_SET\_230415pu

doi: [10.55876/gis8.230415pu](https://doi.org/10.55876/gis8.230415pu)

All genome sequences and associated metadata in this dataset are published in GISAID's EpiCoV database. To view the contributors of each individual sequence with details such as accession number, Virus name, Collection date, Originating Lab and Submitting Lab and the list of Authors, visit [10.55876/gis8.230415pu](https://gisaid.org/230415pu)

### **Data Snapshot**

- EPI\_SET\_230415pu is composed of 39 individual genome sequences.
- The collection dates range from 2020-06-27 to 2021-01-07;
- Data were collected in 1 countries and territories;
- All sequences in this dataset are compared relative to hCoV-19/Wuhan/WIV04/2019 (WIV04), the official reference sequence employed by GISAID (EPI\_ISL\_402124). Learn more at <https://gisaid.org/WIV04>.
